# Supplementary material for: Circular RNA circ-0016068 Promotes the Growth, Migration, and Invasion of Prostate Cancer Cells by Regulating the miR-330-3p/BMI-1 Axis as a Competing Endogenous RNA
Source: PubMed Central journal article supplement (PMC7479067; doi:10.3389/fcell.2020.00827), 2020-08-26
Supplement: Table_1.pdf [file Table_1.pdf]

**Table 1. Sequences of primers for qRT-PCR and miRNA related sequence**

| <b>Name</b>  |         | <b>Sequence</b>                                         |
|--------------|---------|---------------------------------------------------------|
| circ-0016068 | Forward | 5'- GCTTTGGGTTTTCTGAGGGG -3'                            |
|              | Reverse | 5'- CTCAAAGGGATCATGGCAGC -3'                            |
| E-cadherin   | Forward | 5'- GCTGGACCGAGAGAGTTTCC -3'                            |
|              | Reverse | 5'- CAAAATCCAAGCCCGTGGTG -3'                            |
| Vimentin     | Forward | 5'- CGGGAGAAATTGCAGGAGGA -3'                            |
|              | Reverse | 5'-AAGGTCAAGACGTGCCAGAG-3'                              |
| Snail        | Forward | 5'-TCGGAAGCCTAACTACAGCGA-3'                             |
|              | Reverse | 5'-AGATGAGCATTGGCAGCGAG-3'                              |
| miR-330-3p   | Forward | 5'-ACACTCCAGCTGGGAGAGACGTCC<br>GGCACAC-3'               |
|              | Reverse | 5'-CTCAACTGGTGTCGTGGAGTCGGCAATT<br>CAGTTGAGCGTTTCGT -3' |
| BMI-1        | Forward | 5'- CCACCTGATGTGTGTGCTTTG -3'                           |
|              | Reverse | 5'- TTCAGTAGTGGTCTGGTCTTGT -3'                          |
